# Supplementary material
Source: publisher figshare collection journal article supplement (https://frontiersin.figshare.com/ndownloader/files/22362399)
Supplement: Supplementary file 1 [file 22362399]

Supplementary Appendix B: Coordinates of and distances between sampling sites.

| Sampling site | Coordinates | Distance to previous sampling site [m] |
| --- | --- | --- |
| 1 | N 51° 26.323‘ E 6° 57.546‘ | - |
| 1a | N 51° 26.297‘ E 6° 57.572‘ | 50 |
| 2 | N 51° 26.284‘ E 6° 57.598‘ | 50 |
| 3 | N 51° 26.286‘ E 6° 57.663‘ | 100 |
| 4 | N 51° 26.300‘ E 6° 57.712‘ | 50 |
| 5 | N 51° 26.297‘ E 6° 57.750‘ | 50 |
| 6 | N 51° 26.294‘ E 6° 57.794‘ | 50 |
| 7 | N 51° 26.294‘ E 6° 57.840‘ | 50 |
| 8 | N 51° 26.291‘ E 6° 57.883‘ | 50 |
| 9 | N 51° 26.284‘ E 6° 57.924‘ | 50 |
| 10 | N 51° 26.280‘ E 6° 57.968‘ | 50 |
| 11 | N 51° 26.268‘ E 6° 57.048‘ | 100 |
| 11a | N 51° 26.208‘ E 6° 58.427‘ | 50 |
| 11b | N 51° 26.199‘ E 6° 58.468‘ | 50 |
| 12 | N 51° 26.249‘ E 6° 57.219‘ | 100 |
| 13 | N 51° 26.217‘ E 6° 57.387‘ | 200 |
| 14 | N 51° 26.292‘ E 6° 57.568‘ | 200 |
